# Supplementary material for: Transcriptomics of MASLD Pathobiology in African American Patients in the Washington DC Area
Source: MDPI journal article supplement (doi:10.3390/ijms242316654), 2023-11-23
Supplement: s1 [file s1]

Transcriptomics of MASLD Pathobiology in African American Patients in The Washington DC Area

Tanmoy Mondal et al.

**Supplementary Table S1:**

TaqMan® Array Plate; Target genes: 82; Controls: 14; Total assays: 96

|    | Assay ID      | Gene Symbol(s)  | Gene Name(s)                            |
|----|---------------|-----------------|-----------------------------------------|
| 1  | Hs99999901_s1 | <i>18s rRNA</i> | -                                       |
| 2  | Hs01041915_m1 | <i>ADAM17</i>   | ADAM metallopeptidase domain 17         |
| 3  | Hs00178289_m1 | <i>AKT1</i>     | AKT serine/threonine kinase 1           |
| 4  | Hs01048042_m1 | <i>ANGPT2</i>   | angiopoietin 2                          |
| 5  | Hs00180269_m1 | <i>BAX</i>      | BCL2 associated X, apoptosis regulator  |
| 6  | Hs00608023_m1 | <i>BCL2</i>     | BCL2, apoptosis regulator               |
| 7  | Hs00236329_m1 | <i>BCL2L1</i>   | BCL2 like 1                             |
| 8  | Hs00609632_m1 | <i>BID</i>      | BH3 interacting domain death agonist    |
| 9  | Hs01112284_m1 | <i>BIRC2</i>    | baculoviral IAP repeat containing 2     |
| 10 | Hs04194392_s1 | <i>BIRC5</i>    | baculoviral IAP repeat containing 5     |
| 11 | Hs01018151_m1 | <i>CASP8</i>    | caspase 8                               |
| 12 | Hs00982282_m1 | <i>CCL5</i>     | C-C motif chemokine ligand 5            |
| 13 | Hs00765553_m1 | <i>CCND1</i>    | cyclin D1                               |
| 14 | Hs00153380_m1 | <i>CCND2</i>    | cyclin D2                               |
| 15 | Hs01023894_m1 | <i>CDH1</i>     | cadherin 1                              |
| 16 | Hs01004530_m1 | <i>CDH13</i>    | cadherin 13                             |
| 17 | Hs00923894_m1 | <i>CDKN2A</i>   | cyclin dependent kinase inhibitor 2A    |
| 18 | Hs00153439_m1 | <i>CFLAR</i>    | CASP8 and FADD like apoptosis regulator |
| 19 | Hs00355049_m1 | <i>CTNNB1</i>   | catenin beta 1                          |
| 20 | Hs00607978_s1 | <i>CXCR4</i>    | C-X-C motif chemokine receptor 4        |
| 21 | Hs00368995_m1 | <i>DAB2IP</i>   | DAB2 interacting protein                |
| 22 | Hs00183436_m1 | <i>DLC1</i>     | DLC1 Rho GTPase activating protein      |
| 23 | Hs00153451_m1 | <i>E2F1</i>     | E2F transcription factor 1              |
| 24 | Hs01099999_m1 | <i>EGF</i>      | epidermal growth factor                 |
| 25 | Hs01076078_m1 | <i>EGFR</i>     | epidermal growth factor receptor        |
| 26 | Hs00914223_m1 | <i>EP300</i>    | E1A binding protein p300                |
| 27 | Hs04187499_m1 | <i>FADD</i>     | Fas associated via death domain         |
| 28 | Hs00236330_m1 | <i>FAS</i>      | Fas cell surface death receptor         |
| 29 | Hs00179987_m1 | <i>FHIT</i>     | fragile histidine triad                 |
| 30 | Hs01052961_m1 | <i>FLT1</i>     | fms related tyrosine kinase 1           |
| 31 | Hs00275833_s1 | <i>FZD7</i>     | frizzled class receptor 7               |

|    |               |                |                                                                                         |
|----|---------------|----------------|-----------------------------------------------------------------------------------------|
| 32 | Hs04188837_g1 | <i>GADD45B</i> | growth arrest and DNA damage inducible beta                                             |
| 33 | Hs02512067_s1 | <i>GSTP1</i>   | glutathione S-transferase pi 1                                                          |
| 34 | Hs00300159_m1 | <i>HGF</i>     | hepatocyte growth factor                                                                |
| 35 | Hs01011015_m1 | <i>HHIP</i>    | hedgehog interacting protein                                                            |
| 36 | Hs00978050_g1 | <i>HRAS</i>    | HRas proto-oncogene, GTPase                                                             |
| 37 | Hs04188276_m1 | <i>IGF2</i>    | insulin like growth factor 2                                                            |
| 38 | Hs00236877_m1 | <i>IGFBP1</i>  | insulin like growth factor binding protein 1                                            |
| 39 | Hs00365742_g1 | <i>IGFBP3</i>  | insulin like growth factor binding protein 3                                            |
| 40 | Hs00178563_m1 | <i>IRS1</i>    | insulin receptor substrate 1                                                            |
| 41 | Hs00559595_m1 | <i>ITGB1</i>   | integrin subunit beta 1                                                                 |
| 42 | Hs00911700_m1 | <i>KDR</i>     | kinase insert domain receptor                                                           |
| 43 | Hs01547250_m1 | <i>LEF1</i>    | lymphoid enhancer binding factor 1                                                      |
| 44 | Hs01050896_m1 | <i>MCL1</i>    | BCL2 family apoptosis regulator                                                         |
| 45 | Hs01565584_m1 | <i>MET</i>     | MET proto-oncogene, receptor tyrosine kinase                                            |
| 46 | Hs00954125_m1 | <i>MSH2</i>    | mutS homolog 2                                                                          |
| 47 | Hs00989003_m1 | <i>MSH3</i>    | mutS homolog 3                                                                          |
| 48 | Hs00757841_m1 | <i>MTDH</i>    | metadherin                                                                              |
| 49 | Hs00153408_m1 | <i>MYC</i>     | v-myc avian myelocytomatosis viral oncogene homolog                                     |
| 50 | Hs00765730_m1 | <i>NFKB1</i>   | nuclear factor kappa B subunit 1                                                        |
| 51 | Hs00180035_m1 | <i>NRAS</i>    | neuroblastoma RAS viral oncogene homolog                                                |
| 52 | Hs00170168_m1 | <i>OPCML</i>   | opioid binding protein/cell adhesion molecule like                                      |
| 53 | Hs00998018_m1 | <i>PDGFRA</i>  | platelet derived growth factor receptor alpha                                           |
| 54 | Hs01598309_m1 | <i>PIN1</i>    | peptidylprolyl cis/trans isomerase, NIMA-interacting 1                                  |
| 55 | Hs02621230_s1 | <i>PTEN</i>    | phosphatase and tensin homolog                                                          |
| 56 | Hs00153133_m1 | <i>PTGS2</i>   | prostaglandin-endoperoxide synthase 2                                                   |
| 57 | Hs01056457_m1 | <i>PTK2</i>    | protein tyrosine kinase 2                                                               |
| 58 | Hs01547324_gH | <i>PYCARD</i>  | PYD and CARD domain containing                                                          |
| 59 | Hs01902432_s1 | <i>RAC1</i>    | ras-related C3 botulinum toxin substrate 1 (rho family, small GTP binding protein Rac1) |
| 60 | Hs00200394_m1 | <i>RASSF1</i>  | Ras association domain family member 1                                                  |
| 61 | Hs01078066_m1 | <i>RB1</i>     | RB transcriptional corepressor 1                                                        |
| 62 | Hs01022646_m1 | <i>RELN</i>    | reelin                                                                                  |
| 63 | Hs00357608_m1 | <i>RHOA</i>    | ras homolog family member A                                                             |
| 64 | Hs00231709_m1 | <i>RUNX3</i>   | runt related transcription factor 3                                                     |
| 65 | Hs00293258_m1 | <i>SFRP2</i>   | secreted frizzled related protein 2                                                     |
| 66 | Hs00929647_m1 | <i>SMAD4</i>   | SMAD family member 4                                                                    |
| 67 | Hs00998193_m1 | <i>SMAD7</i>   | SMAD family member 7                                                                    |
| 68 | Hs00705164_s1 | <i>SOCS1</i>   | suppressor of cytokine signaling 1                                                      |
| 69 | Hs02330328_s1 | <i>SOCS3</i>   | suppressor of cytokine signaling 3                                                      |

|    |               |                  |                                                                             |
|----|---------------|------------------|-----------------------------------------------------------------------------|
| 70 | Hs00374280_m1 | <i>STAT3</i>     | signal transducer and activator of transcription 3                          |
| 71 | Hs00162613_m1 | <i>TCF4</i>      | transcription factor 4                                                      |
| 72 | Hs00972656_m1 | <i>TERT</i>      | telomerase reverse transcriptase                                            |
| 73 | Hs00608187_m1 | <i>TGFA</i>      | transforming growth factor alpha                                            |
| 74 | Hs00998133_m1 | <i>TGFB1</i>     | transforming growth factor beta 1                                           |
| 75 | Hs00234253_m1 | <i>TGFB2</i>     | transforming growth factor beta receptor 2                                  |
| 76 | Hs00152939_m1 | <i>TLR4</i>      | toll like receptor 4                                                        |
| 77 | Hs00366278_m1 | <i>TNFRSF10B</i> | TNF receptor superfamily member 10b                                         |
| 78 | Hs00921974_m1 | <i>TNFSF10</i>   | tumor necrosis factor superfamily member 10                                 |
| 79 | Hs01034249_m1 | <i>TP53</i>      | tumor protein p53                                                           |
| 80 | Hs00900055_m1 | <i>VEGFA</i>     | vascular endothelial growth factor A                                        |
| 81 | Hs01103751_m1 | <i>WT1</i>       | Wilms tumor 1                                                               |
| 82 | Hs00745222_s1 | <i>XIAP</i>      | X-linked inhibitor of apoptosis                                             |
| 83 | Hs00902712_g1 | <i>YAP1</i>      | Yes associated protein 1                                                    |
| 84 | Hs00608519_m1 | <i>MRPL19</i>    | mitochondrial ribosomal protein L19                                         |
| 85 | Hs00237047_m1 | <i>YWHAZ</i>     | tyrosine 3-monooxygenase/tryptophan 5-monooxygenase activation protein zeta |
| 86 | Hs99999906_m1 | <i>PGK1</i>      | phosphoglycerate kinase 1                                                   |
| 87 | Hs00201226_m1 | <i>CASC3</i>     | cancer susceptibility candidate 3                                           |
| 88 | Hs00609297_m1 | <i>HMBS</i>      | hydroxymethylbilane synthase                                                |
| 89 | Hs00183533_m1 | <i>IPO8</i>      | importin 8                                                                  |
| 90 | Hs00153277_m1 | <i>CDKN1B</i>    | cyclin dependent kinase inhibitor 1B                                        |
| 91 | Hs00172187_m1 | <i>POLR2A</i>    | RNA polymerase II subunit A                                                 |
| 92 | Hs00245445_m1 | <i>ABL1</i>      | ABL proto-oncogene 1, non-receptor tyrosine kinase                          |
| 93 | Hs00362795_g1 | <i>PES1</i>      | pescadillo ribosomal biogenesis factor 1                                    |
| 94 | Hs01102345_m1 | <i>RPL37A</i>    | ribosomal protein L37a                                                      |
| 95 | Hs99999910_m1 | <i>TBP</i>       | TATA-box binding protein                                                    |
| 96 | Hs99999911_m1 | <i>TFRC</i>      | transferrin receptor                                                        |

**Supplementary Table S2:** Genes associated with liver disease significantly dysregulated in NAFLD subjects in this study.

| Gene Name            | Gene Name(s)                                       | Expression Status |
|----------------------|----------------------------------------------------|-------------------|
| <b><i>HMBS</i></b>   | Hydroxymethylbilane synthase                       | Downregulated     |
| <b><i>E2F1</i></b>   | E2F transcription factor 1                         | Downregulated     |
| <b><i>TP53</i></b>   | Tumor protein p53                                  | Downregulated     |
| <b><i>SFRP2</i></b>  | Secreted frizzled related protein 2                | Downregulated     |
| <b><i>STAT3</i></b>  | Signal transducer and activator of transcription 3 | Upregulated       |
| <b><i>ITGB1</i></b>  | Integrin subunit beta 1                            | Upregulated       |
| <b><i>AKT1</i></b>   | AKT serine/threonine kinase 1                      | Upregulated       |
| <b><i>ADAM17</i></b> | ADAM metallopeptidase domain 17                    | Upregulated       |
| <b><i>CFLAR</i></b>  | CASP8 and FADD like apoptosis regulator            | Upregulated       |
| <b><i>TGFB1</i></b>  | Transforming growth factor beta 1                  | Upregulated       |
| <b><i>EP300</i></b>  | E1A binding protein p300                           | Upregulated       |
| <b><i>TCF4</i></b>   | Transcription factor 4                             | Upregulated       |
| <b><i>RUNX3</i></b>  | Runt related transcription factor 3                | Upregulated       |

**Supplementary Table S3:** List of Focus Molecules observed in the top networks by global gene expression analysis. The table containing gene names and synonyms was extracted from Ingenuity Pathway Analysis (IPA), QIAGEN, Germany, March 2023 Release [21]. In this table, we have included the relative gene expression levels (experimental fold change) measured in the NAFLD patients compared to the control.

| Symbol         | Synonym(s)                                                                                                                                                                                                                               | Entrez Gene Name                                  | Affymetrix        | Expr Fold Change |
|----------------|------------------------------------------------------------------------------------------------------------------------------------------------------------------------------------------------------------------------------------------|---------------------------------------------------|-------------------|------------------|
| <b>ADGRE2</b>  | adhesion G protein-coupled receptor E2, CD312, CD97, EMR2, VBU                                                                                                                                                                           | adhesion G protein-coupled receptor E2            | TC1900009838.hg.1 | 2.79             |
| <b>ASPM</b>    | abnormal spindle microtubule assembly, ASP, assembly factor for spindle microtubules, CALMBP1, D330028K02Rik, FLJ10517, FLJ10517 FIS, FLJ12505 FIS, MCPH5, Sha1                                                                          | assembly factor for spindle microtubules          | TC0100016831.hg.1 | -1.31            |
| <b>BMPR1A</b>  | 10q23del, 1110037122Rik, ACVRLK3, ALK-3, Bmpr, BMPR-IA, bone morphogenetic protein receptor type 1A, bone morphogenetic protein receptor, type 1A, CD292, JIP, SKR5                                                                      | bone morphogenetic protein receptor type 1A       | TC1000008315.hg.1 | 1.99             |
| <b>CEACAM3</b> | CD66D, CEA, cea12, Ceacam5, CEA cell adhesion molecule 3, Cear, CGM1, Cgm4, CGM4AA, EG384557, RATCEAA, RATCGM4AA, W264, W282                                                                                                             | CEA cell adhesion molecule 3                      | TC1900008161.hg.1 | 1.83             |
| <b>CEACAM5</b> | 1600029H12Rik, CD66e, CEA, CEA cell adhesion molecule 5, Psg30                                                                                                                                                                           | CEA cell adhesion molecule 5                      | TC1900011741.hg.1 | 1.55             |
| <b>CENPE</b>   | C530022J18, centromere protein E, KIF10, MCPH13, PPP1R61                                                                                                                                                                                 | centromere protein E                              | TC0400011477.hg.1 | -1.6             |
| <b>CKS2</b>    | 1110038L14Rik, CDC28 protein KINASE REGULATORY subunit 2, CDC28 REGULATORY subunit 2, CKSHS2, P13SUC1, RGD1562047                                                                                                                        | CDC28 protein kinase regulatory subunit 2         | TC0900007863.hg.1 | -1.94            |
| <b>CSF2RB</b>  | AI848964, AIC2A, AIC2B, Bc, Beta C, betaGMR, beta IL-3, BIL3, CD131, CDw131, colony stimulating factor 2 receptor, beta 2, low-affinity (granulocyte-macrophage), colony stimulating factor 2 receptor, beta, low-affinity (granulocyte- | colony stimulating factor 2 receptor subunit beta | TC2200007273.hg.1 | 2.03             |

|              |                                                                                                                                                                                                                                                                                                                                                                                                                                                                                                                                                                                                                                                                                                                                                                                                                        |                                         |                   |       |  |
|--------------|------------------------------------------------------------------------------------------------------------------------------------------------------------------------------------------------------------------------------------------------------------------------------------------------------------------------------------------------------------------------------------------------------------------------------------------------------------------------------------------------------------------------------------------------------------------------------------------------------------------------------------------------------------------------------------------------------------------------------------------------------------------------------------------------------------------------|-----------------------------------------|-------------------|-------|--|
|              | macrophage), colony stimulating factor 2 receptor subunit beta, colony stimulating factor 2 receptor subunit $\beta$ , colony stimulating factor 2 receptor, $\beta$ 2, low-affinity (granulocyte-macrophage), colony stimulating factor 2 receptor, $\beta$ , low-affinity (granulocyte-macrophage), Csf2r, Csf2rb1, Csf2rb2, Csfgrmb, Gm-csfr beta IT, Gm csf receptor $\beta$ , Gmcsf receptor $\beta$ c, GM-CSFR $\beta$ , Gm-csfr $\beta$ IT, Gmr $\beta$ c, Granulocyte-macrophage colony stimulating factor 2 receptor, beta 1, Granulocyte-macrophage colony stimulating factor 2 receptor, $\beta$ 1, Il3r, IL3RB, Il3rb1, Il3rb2, Il3rb common, IL3R beta 1, IL3R $\beta$ 1, IL5RB, Il-5Rbetac, Il-5 receptor $\beta$ chain, Il-5R $\beta$ c, SMDP5, $\beta$ C, $\beta$ chain of il 3 receptor, $\beta$ IL-3 |                                         |                   |       |  |
| <b>CTSK</b>  | Cathepsin K, catK, CTS02, CTSO, CTSO1, CTSO2, MMS10-Q, Ms10q, PKND, PYCD                                                                                                                                                                                                                                                                                                                                                                                                                                                                                                                                                                                                                                                                                                                                               | cathepsin K                             | TC0100015754.hg.1 | 1.91  |  |
| <b>DOCK4</b> | 5330406C03, 6330411N01RIK, AF263288, C030023J22, dedicator of cytokinesis 4, mKIAA0716                                                                                                                                                                                                                                                                                                                                                                                                                                                                                                                                                                                                                                                                                                                                 | dedicator of cytokinesis 4              | TC0700012276.hg.1 | 2.09  |  |
| <b>E2F4</b>  | 2010111M04Rik, E2F transcription factor 4                                                                                                                                                                                                                                                                                                                                                                                                                                                                                                                                                                                                                                                                                                                                                                              | E2F transcription factor 4              | TC1600008149.hg.1 | -1.88 |  |
| <b>EFHC1</b> | 1700029F22RIK, dJ304B14.2, EF-hand domain containing 1, EF-hand domain (C-terminal) containing 1, EJM1, LOC684521, mRib72-1, myoclonin1, POC9, RIB72                                                                                                                                                                                                                                                                                                                                                                                                                                                                                                                                                                                                                                                                   | EF-hand domain containing 1             | TC0600008255.hg.1 | 1.29  |  |
| <b>EGLN1</b> | C1orf12, ECTY3, egl-9 family hypoxia-inducible factor 1, HALAH, Hif-p4h-2, HIF-PH2, HPH-2, ORF13, PHD-2, SM-20, ZMYND6                                                                                                                                                                                                                                                                                                                                                                                                                                                                                                                                                                                                                                                                                                 | egl-9 family hypoxia inducible factor 1 | TC0100017730.hg.1 | 1.62  |  |
| <b>GAB2</b>  | AI463667, D130058I17Rik, GRB2-associated binding protein 2, growth factor receptor bound protein 2-associated protein 2, p97, p98                                                                                                                                                                                                                                                                                                                                                                                                                                                                                                                                                                                                                                                                                      | GRB2 associated binding protein 2       | TC1100011744.hg.1 | 2.32  |  |

|               |                                                                                                                                                                                                                                                                                                                                                                                                  |                                                |                   |       |
|---------------|--------------------------------------------------------------------------------------------------------------------------------------------------------------------------------------------------------------------------------------------------------------------------------------------------------------------------------------------------------------------------------------------------|------------------------------------------------|-------------------|-------|
| <b>HMGB3</b>  | high mobility group box 3, HMG-2a, HMG-4, MCOPS13, RGD1564407                                                                                                                                                                                                                                                                                                                                    | high mobility group box 3                      | TC0X00008724.hg.1 | -1.44 |
| <b>LYN</b>    | Hck-2, JTK8, LOC100862590, LYN KINASE, LYN proto-oncogene, Src family tyrosine kinase, p53/56 Lyn, p53Lyn, p53/p56 Lyn, p56Lyn                                                                                                                                                                                                                                                                   | LYN proto-oncogene, Src family tyrosine kinase | TC0800007688.hg.1 | 1.3   |
| <b>MRT04</b>  | 2610012O22Rik, AC163633.1, C1orf33, dJ657E11.4, EG668455, Gm5633, Gm9178, Mg684, mRNA turnover 4, pseudogene 1, mRNA turnover 4, pseudogene 2, mRNA turnover 4, ribosome maturation factor, MRT4, MRT4 homolog, ribosome maturation factor, Mrto4-ps1, Mrto4-ps2, RGD1311709                                                                                                                     | MRT4 homolog, ribosome maturation factor       | TC0100007160.hg.1 | -1.58 |
| <b>MYBL2</b>  | B-MYB, MYBB, MYB proto-oncogene like 2, MYB-Related Protein B, myeloblastosis oncogene-like 2                                                                                                                                                                                                                                                                                                    | MYB proto-oncogene like 2                      | TC2000007438.hg.1 | -1.4  |
| <b>PIWIL4</b> | 9230101H05, 9230101H05Rik, HIWI2, mAgo5, MIWI2, PIWI4, piwi-like RNA-mediated gene silencing 4                                                                                                                                                                                                                                                                                                   | piwi like RNA-mediated gene silencing 4        | TC1100013082.hg.1 | 1.27  |
| <b>POLA1</b>  | alpha PRIMASE p180, DNA polymerase alpha, DNA polymerase alpha 1, catalytic subunit, DNA polymerase alpha subunit 1, DNA polymerase $\alpha$ , DNA polymerase $\alpha$ 1, catalytic subunit, DNA polymerase $\alpha$ subunit 1, NSX, p180, POLA, POLYMERASE alpha, polymerase (DNA directed), alpha 1, polymerase (DNA directed), $\alpha$ 1, POLYMERASE $\alpha$ , VEODS, $\alpha$ PRIMASE p180 | DNA polymerase alpha 1, catalytic subunit      | TC0X00006823.hg.1 | -1.53 |
| <b>PTX3</b>   | LOC682447, pentraxin 3, pentraxin related gene, TNFAIP5, TSG-14                                                                                                                                                                                                                                                                                                                                  | pentraxin 3                                    | TC0300009301.hg.1 | -1.87 |
| <b>SFTPC</b>  | BRICD6, pro-SpC, PSP-C, SFTP2, SMDP2, SP5, SP-C, surfactant associated protein C, surfactant protein C                                                                                                                                                                                                                                                                                           | surfactant protein C                           | TC0800012277.hg.1 | -1.3  |

|                      |                                                                                                                                                                                                                                                                           |                                         |                   |       |
|----------------------|---------------------------------------------------------------------------------------------------------------------------------------------------------------------------------------------------------------------------------------------------------------------------|-----------------------------------------|-------------------|-------|
| <b><i>SRRM2</i></b>  | 5033413A03Rik, AA410130, Cwc21, CWF21, HSPC075, KIAA0324, mKIAA0324, serine/arginine repetitive matrix 2, SRL300, SRm300                                                                                                                                                  | serine/arginine repetitive matrix 2     | TC1600006633.hg.1 | 1.3   |
| <b><i>SSX2IP</i></b> | ADIP, AU042321, hMsd1, LOC100909794, LOC308023, SSX family member 2 interacting protein, synovial sarcoma, X 2 interacting protein                                                                                                                                        | SSX family member 2 interacting protein | TC0100014762.hg.1 | -1.71 |
| <b><i>TFDP2</i></b>  | 1110029I05RIK, A330080J22RIK, DP2, DP-3, Tcfdp2, transcription factor Dp-2                                                                                                                                                                                                | transcription factor Dp-2               | TC0300012654.hg.1 | -2.91 |
| <b><i>TGFB1</i></b>  | Beta Ig-h3, CED, DPD1, IBDIMDE, LAP, TGFβ, TGFβbeta, TGF-beta1, TGF-β, TGF-β1, tgf-β(1), transforming growth factor beta 1, transforming growth factor, beta 1, transforming growth factor-β 1, Transforming growth factor-β(1), transforming growth factor, β 1, β Ig-h3 | transforming growth factor beta 1       | TC1900010743.hg.1 | 1.64  |
| <b><i>TPM1</i></b>   | AI854628, alpha-TM, BI546321, BQ310475, C15ORF13, C76867, CMD1Y, CMH3, HEL-S-265, HTM-alpha, HTM-α, LVNC9, TM1, Tm3, Tma2, Tm alpha, Tmpa, TMSA, Tm α, TPM1kappa, TROPOMYOSIN 1, α-TM                                                                                     | tropomyosin 1                           | TC1500007510.hg.1 | -1.82 |
| <b><i>TTK</i></b>    | CT96, ESK, Esk1, MPH1, MPS1, MPS1L1, PYT, TTK protein kinase                                                                                                                                                                                                              | TTK protein kinase                      | TC0600008630.hg.1 | 1.61  |
| <b><i>UMPS</i></b>   | 1700095D23RIK, BB164745, OPRT, Orotidylic acid (OMP) decarboxylase, uridine monophosphate synthetase                                                                                                                                                                      | uridine monophosphate synthetase        | TC0300008604.hg.1 | -1.41 |
| <b><i>ZFP36</i></b>  | GOS24, GOS24, GROWTH FACTOR INDUCIBLE NUCLEAR protein 475, NUP475, RNF162A, TIS11, TIS11D, TISII, TRISTETRAPROLIN, TRISTETRAPROLINE, TTP, ZFP36 ring finger protein, zinc finger protein 36, ZINC FINGER TRANSCRIPTIONAL REGULATOR                                        | ZFP36 ring finger protein               | TC1900008057.hg.1 | 1.59  |
| <b><i>ZNF652</i></b> | 9530033F24Rik, B130006D01Rik, RGD1566329, Zfp652, zinc finger protein 652                                                                                                                                                                                                 | zinc finger protein 652                 | TC1700011038.hg.1 | 1.99  |



**Supplementary Table S4:** List of Focus Molecules observed in the top networks by TLDA gene expression analysis. The information the table including gene names and synonyms were exported from Ingenuity Pathway Analysis (IPA), QIAGEN, Germany, March 2023 Release [21]. We have incorporated the relative gene expression (experimental fold change) levels measured in the patients' group.

| Symbol       | Synonym(s)                                                                                                                                                                                                                                                                                      | Entrez Gene Name                       | Life Technologies (Applied Biosystems) | Expr Log Ratio |
|--------------|-------------------------------------------------------------------------------------------------------------------------------------------------------------------------------------------------------------------------------------------------------------------------------------------------|----------------------------------------|----------------------------------------|----------------|
| <b>AKT1</b>  | AKT, AKT serine/threonine kinase 1, LTR-akt, PKB, PKB/Akt, PKB-ALPHA, PKB- $\alpha$ , PRKBA, Protein kinase B, RAC, RAC-ALPHA, RAC- $\alpha$ , Thymoma proto-oncogene 1, thymoma viral proto-oncogene 1                                                                                         | AKT serine/threonine kinase 1          | Hs00178289_m1                          | 0.040885       |
| <b>CCL5</b>  | C-C motif chemokine ligand 5, chemokine (C-C motif) ligand 5, D17S136E, eoCP, MuRantes, RANTES, RNTES, SCYA5, Similar to merantes, SISd, SIS-delta, SIS- $\delta$ , TCP228                                                                                                                      | C-C motif chemokine ligand 5           | Hs00982282_m1                          | -0.22712       |
| <b>CXCR4</b> | b2b220Clo, CD184, CHEMOKINE CXCR4 receptor, chemokine (C-X-C motif) receptor 4, CHEMOKINE receptor 4, Cmkar4, C-X-C motif chemokine receptor 4, D2S201E, FB22, FUSIN, HM89, HSY3RR, LAP-3, LCR1, LESTR, LOC100047410, NPY3R, NPYR, NPYRL, NPY3R, PB-CKR, PBSF/SDF-1, Sdf1r, WHIM, WHIMS, WHIMS1 | C-X-C motif chemokine receptor 4       | Hs00607978_s1                          | -0.23092       |
| <b>EGF</b>   | beta-urogastrone, CN02, EGF-1, epidermal growth factor, epidermal growth factors, epidermal growth factor-urogastrone, HOMG4, LOC103691699, Rac1/Cdc42 activator II, URG, urogastrone, $\beta$ -urogastrone                                                                                     | epidermal growth factor                | Hs01099999_m1                          | -0.15854       |
| <b>FLT1</b>  | FLT, FMS-like tyrosine kinase 1, fms related receptor tyrosine kinase 1, VEGFR-1                                                                                                                                                                                                                | fms related receptor tyrosine kinase 1 | Hs01052961_m1                          | 0.000316       |
| <b>HGF</b>   | C230052L06Rik, DFNB39, F-TCF, hepatocyte growth factor, HGFB, HGF/SF, HPTA, NK1, NK2, SF, SF/HGF                                                                                                                                                                                                | hepatocyte growth factor               | Hs00300159_m1                          | -0.22871       |

|                      |                                                                                                                                                                                                                                                                                                                                                                                                       |                                               |               |          |
|----------------------|-------------------------------------------------------------------------------------------------------------------------------------------------------------------------------------------------------------------------------------------------------------------------------------------------------------------------------------------------------------------------------------------------------|-----------------------------------------------|---------------|----------|
| <b><i>HRAS</i></b>   | C-BAS/HAS, C-HA-RAS, C-HA-RAS1, C-H-RAS, c-rasHa, CTLO, HAMSV, HA-RAS, Harvey-ras, Harvey rat sarcoma virus oncogene, HRAS1, H-RASIDX, HRas proto-oncogene, GTPase, Kras2, RAS, RASH1, RAS HA, V-H-RAS                                                                                                                                                                                                | HRas proto-oncogene, GTPase                   | Hs00978050_g1 | 0.116924 |
| <b><i>IGFBP3</i></b> | BP-53, IBP3, IGBP3, IGF binding protein 3, IGFI BP3, IGfbp3, Insulin-like growth factor-binding protein 3                                                                                                                                                                                                                                                                                             | insulin like growth factor binding protein 3  | Hs00365742_g1 | 0.110458 |
| <b><i>ITGB1</i></b>  | 4633401G24RIK, beta1-Integrin, CD29, CD29 antigen, FNRB, Gm9863, GPIIA, integrin beta 1 (fibronectin receptor beta), integrin subunit beta 1, integrin subunit $\beta$ 1, Integrin $\beta$ 1, integrin $\beta$ 1 (fibronectin receptor $\beta$ ), Integrin $\beta$ 1 receptor, LOC102556297, MDF2, MSK12, VLAB, VLA-BETA, VLA- $\beta$ , $\beta$ 1-Integrin, $\beta$ (1)-integrins                    | integrin subunit beta 1                       | Hs00559595_m1 | 0.035153 |
| <b><i>MET</i></b>    | AI838057, AUTS9, c-Met, DA11, DFNB97, HGF, HGF Binding, HGFR, LOC360378, met proto-oncogene, MET proto-oncogene, receptor tyrosine kinase, MetR, PAR4, RCCP2                                                                                                                                                                                                                                          | MET proto-oncogene, receptor tyrosine kinase  | Hs01565584_m1 | 0.079116 |
| <b><i>PDGFRA</i></b> | APDGFR, CD140A, LOC102554024, PDGFACE, Pdgfar, PDGFR-2, PDGFR alpha, Pdgf receptor- $\alpha$ , PDGFR $\alpha$ , PDGF $\alpha$ R, Pdgf $\alpha$ Receptor, platelet derived growth factor receptor alpha, platelet derived growth factor receptor, alpha polypeptide, platelet derived growth factor receptor $\alpha$ , platelet derived growth factor receptor, $\alpha$ polypeptide, $\alpha$ -pdgfr | platelet derived growth factor receptor alpha | Hs00998018_m1 | -0.11542 |
| <b><i>PTEN</i></b>   | 10q23del, 2310035O07RIK, A130070J02Rik, B430203M17RIK, BZS, CWS1, DEC, GLM2, MHAM, Mmac, MMAC1, MUTATED IN MULTIPLE ADVANCED CANCERS, mutated in multiple advanced cancers 1, O54857, phosphatase and tensin homolog, PTEN1, PTENbeta, TEP1                                                                                                                                                           | phosphatase and tensin homolog                | Hs02621230_s1 | -0.07493 |
| <b><i>PTGS2</i></b>  | Cox, COX-2, CYCLO-OXYGENASE 2, GRIPGHS, hCox-2, hnCOX-2, INDUCIBLE CYCLOOXYGENASE, PES-2, PGG/HS, PGHS-2, PGH synthase 2,                                                                                                                                                                                                                                                                             | prostaglandin-endoperoxide synthase 2         | Hs00153133_m1 | -0.15236 |

|               |                                                                                                                                                                                                                                                                                                                             |                                      |               |          |  |
|---------------|-----------------------------------------------------------------------------------------------------------------------------------------------------------------------------------------------------------------------------------------------------------------------------------------------------------------------------|--------------------------------------|---------------|----------|--|
|               | Pgi2 synthase, Pgs2, Pgsi, PHS-2, PHS II, Prostaglandin endoperoxide synthase 2, TIS10                                                                                                                                                                                                                                      |                                      |               |          |  |
| <b>PTK2</b>   | FADK, FADK 1, FAK, FAK1, FAK related non-kinase, p125FAK, pp125FAK, PPP1R71, protein tyrosine kinase 2, PTK2 protein tyrosine kinase 2, TYROSINE KINASE 2                                                                                                                                                                   | protein tyrosine kinase 2            | Hs01056457_m1 | -0.1887  |  |
| <b>PYCARD</b> | 9130417A21Rik, ASC, CARD5, hASC, masc, MGC10332, PYD and CARD domain containing, TMS, TMS-1, TNS1                                                                                                                                                                                                                           | PYD and CARD domain containing       | Hs01547324_gH | -0.1119  |  |
| <b>RAC1</b>   | AL023026, D5Ert559e, MIG5, MRD48, p21-RAC, p21-Rac1, Rac, Rac family small GTPase 1, TC-25                                                                                                                                                                                                                                  | Rac family small GTPase 1            | Hs01902432_s1 | -0.07613 |  |
| <b>SMAD7</b>  | CRCS3, MADH7, MADH8, SMAD family member 7                                                                                                                                                                                                                                                                                   | SMAD family member 7                 | Hs00998193_m1 | -0.07433 |  |
| <b>SOCS3</b>  | ATOD4, CIS3, CISH3, EF-10, Soc3, Sosc3, SSI-3, Suppressor of cytokine signaling 3                                                                                                                                                                                                                                           | suppressor of cytokine signaling 3   | Hs02330328_s1 | -0.00201 |  |
| <b>TGFA</b>   | ETGF, RATTGFAA, TFGA, TGFAA, Tgf alpha, Tgf $\alpha$ , transforming growth factor alpha, transforming growth factor- $\alpha$ , wa-1                                                                                                                                                                                        | transforming growth factor alpha     | Hs00608187_m1 | -0.00053 |  |
| <b>TGFB1</b>  | Beta Ig-h3, CED, DPD1, IBDIMDE, LAP, TGFB, TGFbeta, TGF-beta1, TGF- $\beta$ , TGF- $\beta$ 1, tgf- $\beta$ (1), transforming growth factor beta 1, transforming growth factor, beta 1, transforming growth factor- $\beta$ 1, Transforming growth factor- $\beta$ (1), transforming growth factor, $\beta$ 1, $\beta$ Ig-h3 | transforming growth factor beta 1    | Hs00998133_m1 | 0.353578 |  |
| <b>TLR4</b>   | ARMD10, CD284, HTOLL, Ly87, Ran/M1, Rasl2-8, Tlrp4, TOLL, toll-like receptor 4, TOLL receptor                                                                                                                                                                                                                               | toll like receptor 4                 | Hs00152939_m1 | -0.11595 |  |
| <b>VEGFA</b>  | Gd-vegf, MVCD1, vascular endothelial growth factor A, VEGF, VEGF111, Vegf-3, VPF                                                                                                                                                                                                                                            | vascular endothelial growth factor A | Hs00900055_m1 | -0.03679 |  |

**Supplementary Table S5:** NAFLD Participants with detailed FibroScan and Dyslipidemia data.

| Participant<br>SI No. | Participant<br>Type | Gender | FibroScan | Dyslipidemia<br>(LDL HDL Tri) |
|-----------------------|---------------------|--------|-----------|-------------------------------|
| 1                     | NAFLD               | Female | F0, S3    | -                             |
| 2                     | NAFLD               | Female | -         | 136 37 217                    |
| 3                     | NAFLD               | Male   | F0, S0    | 100 51 87                     |
| 4                     | NAFLD               | Female | F2, S2    | 185 64 202                    |
| 5                     | NAFLD               | Female | F0-F1, S2 | 117 65 105                    |
| 6                     | NAFLD               | Female | F0, S2-S3 | 157 55 95                     |
| 7                     | NAFLD               | Male   | F2, S1-S2 | 65 60 103                     |
| 8                     | NAFLD               | Male   | F0, S0    | 67 31 311                     |
| 9                     | NAFLD               | Male   | F4, S1-S2 | 18 24 59                      |
| 10                    | NAFLD               | Female | F0, S2-S3 | 63 63 61                      |
| 11                    | NAFLD               | Female | -         | -                             |
| 12                    | NAFLD               | Male   | F0-F1, S3 | 36 21 306                     |
| 13                    | NAFLD               | Female | F2-F3, S3 | 107 72 69                     |
| 14                    | NAFLD               | Male   | F0-F1, S1 | 148 38 81                     |
| 15                    | NAFLD               | Female | -         | 114 39 163                    |
| 16                    | NAFLD               | Female | F0-F1, S0 | 107 68 64                     |
| 17                    | NFALD               | Male   | F0-F1, S3 | 157 41 222                    |
| 18                    | NFALD               | Male   | F0-F1, S0 | 160 38 150                    |
| 19                    | NAFLD               | Male   | F0, S0    | 71 36 73                      |
| 20                    | NAFLD               | Male   | F3, S0    | 119 76 67                     |
| 21                    | NAFLD               | Female | F3, S2-S3 | -                             |
| 22                    | NAFLD               | Male   | F2, S3    | 58 27 222                     |
| 23                    | NAFLD               | Female | F2, S3    | 93 48 127                     |

\*F0-Normal, F1-Mild, F3-Moderate, and F4-Severe.

\*\*S0-Less than 11% (normal), S1-11% to 33%, S2-34% to 66%, S3-Greater than 67%.

\*\*\* To select the participants, we kept importance at BMI, HbA1c value, dyslipidemia, and presence of steatosis (as measured by FibroScan). For the purposes of liver steatosis, we considered the S grade on the FibroScan (S0 - S3). The higher the grade, the higher percentage of liver affected by fatty change.
